# Supplementary material for: Screening for Problematic Internet Use May Help Identify Impulse Control Disorders in Parkinson’s Disease
Source: Hindawi journal article supplement (doi:10.1155/2019/4925015), 2019-02-03
Supplement: f1 [file 4925015.f1.pdf]

## Supplementary file

Table. Impulse control disorders identified by the standard and standard+PIUQ methods.

|            | Compulsive gambling | Compulsive sexuality | Compulsive buying | Compulsive Eating | Compulsive hobbyism, punding, etc. | Drug addiction | Internet addiction | Internet overuse | Identified by the standard methods | Identified by the standard +internet method |
|------------|---------------------|----------------------|-------------------|-------------------|------------------------------------|----------------|--------------------|------------------|------------------------------------|---------------------------------------------|
| Patient 1  | S                   |                      |                   |                   |                                    |                |                    | I                | S                                  |                                             |
| Patient 2  | S                   |                      | S                 |                   |                                    |                |                    | I                | S                                  |                                             |
| Patient 3  | S                   | S                    | S                 |                   |                                    |                |                    | I                | S                                  |                                             |
| Patient 4  | I                   |                      |                   |                   |                                    |                |                    | I                |                                    | I                                           |
| Patient 5  | I                   |                      |                   |                   |                                    |                |                    | I                |                                    | I                                           |
| Patient 6  | I                   |                      |                   |                   |                                    |                |                    | I                |                                    | I                                           |
| Patient 7  | I                   |                      |                   |                   | I                                  |                | I                  | I                |                                    | I                                           |
| Patient 8  | I                   | I                    |                   |                   |                                    |                |                    | I                |                                    | I                                           |
| Patient 9  | I                   | I                    | I                 |                   | I                                  |                | I                  | I                |                                    | I                                           |
| Patient 10 |                     | S                    | S                 |                   | S                                  |                |                    | I                | S                                  |                                             |
| Patient 11 |                     | I                    |                   |                   |                                    |                |                    | I                |                                    | I                                           |
| Patient 12 |                     | I                    |                   |                   | I                                  |                | I                  | I                |                                    | I                                           |
| Patient 13 |                     | I                    |                   |                   | I                                  |                | I                  | I                |                                    | I                                           |
| Patient 14 |                     | I                    |                   |                   | I                                  |                | I                  | I                |                                    | I                                           |
| Patient 15 |                     |                      | S                 | S                 | S                                  |                |                    | I                | S                                  |                                             |
| Patient 16 |                     |                      |                   | S                 |                                    |                |                    | I                | S                                  |                                             |
| Patient 17 |                     |                      |                   | S                 |                                    |                |                    | I                | S                                  |                                             |
| Patient 18 |                     |                      |                   | S                 |                                    |                |                    |                  | S                                  |                                             |
| Patient 19 |                     |                      |                   | S                 | S                                  |                |                    | I                | S                                  |                                             |
| Patient 20 |                     |                      |                   | S                 |                                    |                |                    | I                | S                                  |                                             |
| Patient 21 |                     |                      |                   | S                 |                                    |                |                    |                  | S                                  |                                             |
| Patient 22 |                     |                      |                   | S                 |                                    |                |                    | I                | S                                  |                                             |
| Patient 23 |                     |                      |                   | S                 |                                    |                |                    |                  | S                                  |                                             |
| Patient 24 |                     |                      | S                 |                   |                                    |                |                    | I                | S                                  |                                             |
| Patient 25 |                     |                      | S                 |                   |                                    |                |                    |                  | S                                  |                                             |
| Patient 26 |                     |                      | S                 |                   | S                                  |                |                    | I                | S                                  |                                             |
| Patient 27 |                     |                      |                   |                   | S                                  |                |                    | I                | S                                  |                                             |
| Patient 28 |                     |                      |                   |                   | S                                  |                |                    | I                | S                                  |                                             |
| Patient 29 |                     |                      |                   |                   | S                                  |                |                    | I                | S                                  |                                             |
| Frequency  | 9                   | 2                    | 7                 | 9                 | 12                                 | 0              | 5                  | 25               | 19                                 | 10                                          |

Abbreviations: I = Internet use-based (standard+PIUQ) method; S = Standard method;

For definitions, refer to text.
